# Supplementary material
Source: MDPI journal article supplement (https://www.mdpi.com/1424-8247/14/6/545)
Supplement: s1 [file Supplementary_material.pdf › Supplementary_material.pdf]

**Supplementary Table S1.** Literature reports and pharmacokinetic parameters of metformin given intravenously in different species

| Reference                   | Species | Strain         | Sex | Dosing route | Dose (mg/kg)        | Assay    | $CL$ (mL/min/kg) | $CL_R$ (mL/min/kg) | $V_{SS}$ (mL/kg) |
|-----------------------------|---------|----------------|-----|--------------|---------------------|----------|------------------|--------------------|------------------|
| Tsuda et al (2009) [26]     | Mouse   | C57BL/6        | M   | IV           | 5                   | HPLC-UV  | 40.7             | 37.2               | 994              |
| Higgins et al (2012) [27]*  | Mouse   | FVB            | M   | IV           | 5                   | LC-MS/MS | 81.7             | 40.0               | 1840             |
| Nakamichi et al (2013) [28] | Mouse   | C57BL/6J       | M   | IV(+IF)      | 6 (+0.12 mg/min/kg) | HPLC-UV  | 60.7             | 60.3               | -                |
| Chen et al (2015) [29]      | Mouse   | C57BL/6J       | M   | IV           | 50                  | LSC      | 18.6             | -                  | 1480             |
| Shirasaka et al (2016) [30] | Mouse   | FVB            | M   | IV           | 8                   | LSC      | 12.7             | -                  | 1740             |
| Kakemi et al (1983) [31]    | Rat     | Wistar         | M   | IV           | 50                  | GC-MS    | 42.8**           | -                  | 1920**           |
|                             |         |                |     |              | 100                 | GC-MS    | 14.5**           | -                  | 1020**           |
|                             |         |                |     |              | 200                 | GC-MS    | 7.73**           | -                  | 880**            |
| Choi et al (2006) [32]*     | Rat     | Sprague-Dawley | M   | IV           | 50                  | HPLC-UV  | 26.4             | 19.5               | 693              |
|                             |         |                |     |              | 100                 | HPLC-UV  | 24.5             | 18.7               | 586              |
|                             |         |                |     |              | 200                 | HPLC-UV  | 23.6             | 17.8               | 586              |
| Choi and Lee (2006) [33]    | Rat     | Sprague-Dawley | M   | IV           | 100                 | HPLC-UV  | 17.2-23.0        | 10.5-13.4          | 566-844          |
| Choi et al (2007) [34]      | Rat     | Sprague-Dawley | M   | IV           | 100                 | HPLC-UV  | 20.2             | 11.7               | 797              |
| Choi et al (2007) [35]      | Rat     | Sprague-Dawley | M   | IV           | 100                 | HPLC-UV  | 21.7             | 13.6               | 444              |
| Choi et al (2007) [36]      | Rat     | Sprague-Dawley | M   | IV           | 30 $\mu$ mol/mL/kg  | HPLC-UV  | 19.0             | -                  | 426              |

|                             |     |                |   |    |     |          |           |            |         |
|-----------------------------|-----|----------------|---|----|-----|----------|-----------|------------|---------|
| Maeda et al<br>(2007) [37]  | Rat | Wistar         | M | IV | 1   | LSC      | 12.3      | -          | 764     |
| Lee et al<br>(2008) [38]    | Rat | Sprague-Dawley | M | IV | 100 | HPLC-UV  | 19.6      | 11.7       | 655     |
| Choi et al<br>(2008) [39]   | Rat | Sprague-Dawley | M | IV | 100 | HPLC-UV  | 20.3-22.6 | 11.7-12.4  | 651-826 |
| Choi et al<br>(2008) [40]   | Rat | Sprague-Dawley | M | IV | 100 | HPLC-UV  | 16.8      | 9.46       | 539     |
| Jin et al<br>(2008) [41]    | Rat | Sprague-Dawley | M | IV | 5   | HPLC-UV  | 21.4      | 17.6       | 766     |
| Cho et al<br>(2009) [42]    | Rat | Sprague-Dawley | M | IV | 100 | HPLC-UV  | 14.6      | 10.9       | 307     |
| Lee et al<br>(2010) [43]    | Rat | Sprague-Dawley | M | IV | 100 | HPLC-UV  | 22.3      | 6.67       | 755     |
| Choi et al<br>(2010) [44]   | Rat | Sprague-Dawley | M | IV | 100 | HPLC-UV  | 14.7      | 11.6       | 383     |
| Choi and Lee<br>(2012) [45] | Rat | Sprague-Dawley | M | IV | 100 | HPLC-UV  | 21.3      | 14.9       | 764     |
| Lee et al<br>(2013) [46]    | Rat | Sprague-Dawley | M | IV | 50  | HPLC-UV  | 33.8      | 25.8       | 929     |
| Kwon et al<br>(2015) [47]   | Rat | Sprague-Dawley | M | IV | 2   | LC-MS/MS | 25.9      | -          | 867     |
| Ma et al<br>(2016) [48]     | Rat | Wistar         | M | IV | 25  | HPLC-UV  | 8         | 28.6-74.2% | 3250    |
|                             |     |                | F | IV | 25  | HPLC-UV  | 6         | 26.7-57.6% | 3530    |
| Gabr et al<br>(2017) [49]   | Rat | Sprague-Dawley | M | IV | 30  | LC-MS    | 29.5      | 27.2       | 2320    |
| Ma et al<br>(2018) [50]     | Rat | Wistar         | M | IV | 25  | HPLC-UV  | 23.3      | 70.3%**    | 3050    |
| Yang et al<br>(2018) [51]   | Rat | Wistar         | M | IV | 25  | LC-MS/MS | 9.07      | 7.05       | 1040    |

|                                |         |                    |         |    |        |           |        |      |        |
|--------------------------------|---------|--------------------|---------|----|--------|-----------|--------|------|--------|
| Nishizawa et al (2019) [52]    | Rat     | Wistar             | M       | IV | 30     | LC-MS/MS  | 41.2   | 23.0 | 1320   |
| Han and Choi (2020) [53]       | Rat     | Sprague-Dawley     | M       | IV | 30     | HPLC-UV   | 24.2   | 16.1 | 349    |
| Bouriche et al (2020) [54]*    | Rabbit  | New Zealand        | F       | IV | 5      | HPLC-UV   | 2.05   | -    | 413    |
| Michels et al (1999) [55]*     | Cat     | Domestic shorthair | -       | IV | 25     | HPLC-UV   | 2.5    | 2.17 | 550    |
| Shen et al (2016) [56]*        | Monkey  | Cynomolgus         | M       | IV | 3.9    | LC-MS/MS  | 11.2   | 10.7 | 980    |
| Morse et al (2017) [57]        | Monkey  | Cynomolgus         | M       | IV | 2.5    | LC-MS/MS  | 8.06** | 86%  | 353**  |
| Patel et al (2017) [58]        | Minipig | Yucatan            | M       | IV | 0.5    | LC-MS/MS  | 10.1   | -    | -      |
|                                |         | Hanford*           | M       | IV | 0.5    | LC-MS/MS  | 9.7    | -    | 2260   |
|                                |         | Sinclair           | M       | IV | 0.5    | LC-MS/MS  | 8.7    | -    | 991    |
|                                |         | Gottingen          | M       | IV | 0.5    | LC-MS/MS  | 19.6   | -    | 695    |
| Johnston et al (2017) [59]*    | Dog     | Mixed              | -       | IV | 24.8   | FIA-MS/MS | 24.1   | -    | 10100  |
| Sirtori et al (1978) [60]*     | Man     | Healthy            | 4 M 1 F | IV | 926 mg | GC-MS     | 6.13   | 4.65 | 432**  |
| Pentikäinen et al (1979) [61]* | Man     | Healthy            | 1 M 2 F | IV | 500 mg | LSC       | 7.61   | 7.52 | 856**  |
| Tucker et al (1981) [62]*      | Man     | Healthy            | M       | IV | 250 mg | GC-EC     | 10.1   | 7.83 | 511**  |
| Hustace et al (2009) [63]*     | Horse   | -                  | -       | IV | 6 g    | HPLC-UV   | 10.8   | -    | 2250** |

\* Dataset used for minimal physiologically-based pharmacokinetic model fitting across 9 species

\*\* Calculated from digitized data

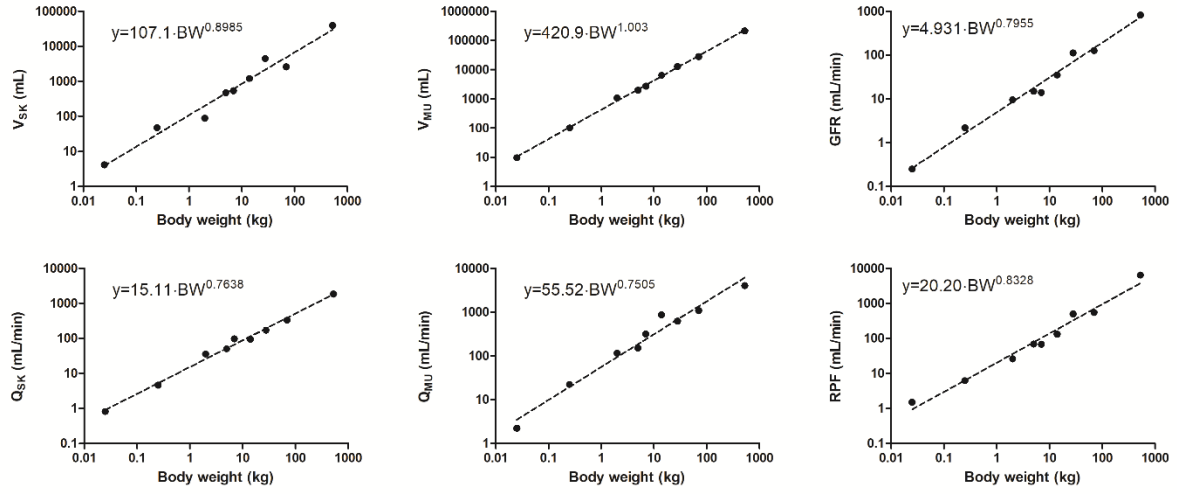

**Supplementary Figure S1.** Physiological and anatomical information (i.e.,  $V_{SK}$ ,  $V_{MU}$ ,  $Q_{SK}$ ,  $Q_{MU}$ ,  $RPF$ , and  $GFR$ ) collected from different sources (Supplementary Table S2) showed an allometric relationship among 9 species [i.e., mouse (0.025 kg), rat (0.25 kg), rabbit (2 kg), cat (5 kg), monkey (7 kg), minipig (14 kg), dog (28 kg), man (70 kg), and horse (530 kg)]

**Supplementary Table S2.** Summary of physiological input variables for meta-analysis of metformin pharmacokinetics in various species

|                                | Mouse              | Rat              | Rabbit             | Cat               | Monkey            | Minipig           | Dog               | Man               | Horse              |
|--------------------------------|--------------------|------------------|--------------------|-------------------|-------------------|-------------------|-------------------|-------------------|--------------------|
| <i>BW</i> (kg)                 | 0.025              | 0.25             | 2                  | 5                 | 7                 | 14                | 28                | 70                | 530                |
| <i>V<sub>B</sub></i> (mL)      | 1.64               | 15.3             | 120                | 300               | 420               | 875               | 2520              | 5200 <sup>a</sup> | 39800              |
| <i>V<sub>SK</sub></i> (mL)     | 4.13               | 47.5             | 88 <sup>a</sup>    | 469 <sup>b</sup>  | 540 <sup>c</sup>  | 1200 <sup>d</sup> | 4480              | 2600              | 39200              |
| <i>V<sub>MU</sub></i> (mL)     | 9.6                | 101              | 1080 <sup>a</sup>  | 1980 <sup>b</sup> | 2750 <sup>c</sup> | 6390              | 12800             | 28000             | 213000             |
| <i>Q<sub>CO</sub></i> (mL/min) | 14.0               | 80.0             | 395                | 786               | 1010              | 1700              | 2860              | 5690              | 26000              |
| <i>Q<sub>SK</sub></i> (mL/min) | 0.813              | 4.64             | 35.6 <sup>e</sup>  | 50.4 <sup>b</sup> | 96.4 <sup>c</sup> | 94.8 <sup>d</sup> | 172               | 330               | 1840 <sup>f</sup>  |
| <i>Q<sub>MU</sub></i> (mL/min) | 2.23               | 22.2             | 116 <sup>a</sup>   | 151 <sup>b</sup>  | 315 <sup>c</sup>  | 863 <sup>d</sup>  | 621               | 1090              | 4040 <sup>f</sup>  |
| <i>GFR</i> (mL/min)            | 0.25               | 2.18             | 9.6                | 15 <sup>g</sup>   | 14                | 35 <sup>d</sup>   | 112               | 126               | 820 <sup>h</sup>   |
| <i>RPF</i> (mL/min)            | 1.50 <sup>i</sup>  | 6.20             | 26.1 <sup>e</sup>  | 69.2 <sup>b</sup> | 67.3 <sup>c</sup> | 131 <sup>d</sup>  | 500 <sup>j</sup>  | 547               | 6400 <sup>k</sup>  |
| Gut radius ( <i>R</i> ) (cm)   | 0.135 <sup>l</sup> | 0.2              | 0.246 <sup>m</sup> | 0.35 <sup>n</sup> | 0.6               | 1 <sup>d</sup>    | 1.25 <sup>d</sup> | 2.5               | 3 <sup>o</sup>     |
| <i>V<sub>Lumen</sub></i> (mL)  | 0.4                | 6.18             | 74.5               | 145 <sup>p</sup>  | 894               | 754               | 1000              | 330               | 15500 <sup>p</sup> |
| <i>T<sub>SI</sub></i> (min)    | 96.2 <sup>q</sup>  | 103 <sup>r</sup> | 80 <sup>s</sup>    | 144 <sup>t</sup>  | 180               | 210               | 111               | 238               | 240 <sup>u</sup>   |

*V<sub>SK</sub>*, *V<sub>MU</sub>*, *Q<sub>SK</sub>*, *Q<sub>MU</sub>*, *RPF*, and *Q<sub>CO</sub>* ( $= 0.235 \cdot BW^{0.75}$ ) from Brown et al (1997) [1], *V<sub>B</sub>* from Wolfensohn & Lloyd (2003) [2], *GFR* from Lin (1995) [3], and gut radius from Kararli (1995) [4], unless otherwise noted

<sup>a</sup>Davies & Morris (1993) [5]; <sup>b</sup>Lindstedt & Schaeffer (2002) [6]; <sup>c</sup>Values adopted in Simcyp V19 (Simcyp Ltd. Sheffield, UK) [7];

<sup>d</sup>Suenderhauf & Parrott (2013) [8]; <sup>e</sup>Sweeny et al (2009) [9]; <sup>f</sup>Staddon et al (1984) [10]; <sup>g</sup>Von Hendy-Willson & Pressler (2011) [11]; <sup>h</sup>Walsh and Royal (1992) [12]; <sup>i</sup>Thuesen et al (2014) [13]; <sup>j</sup>Wesolowski et al (2019) [14]; <sup>k</sup>Holdstock et al (1998) [15]; <sup>l</sup>Ferraris et al (1989) [16]; <sup>m</sup>Merchant et al (2011) [17]; <sup>n</sup>Bettini et al (2003) [18]; <sup>o</sup>Clauss et al (2003) [19]

*V<sub>Lumen</sub>* as the sum of fluid volume in stomach and small intestine, obtained from Hatton et al (2015) [20]; <sup>p</sup>cat and horse values were estimated by the interpolation and extrapolation from allometric relationship between *V<sub>Lumen</sub>* and *BW* in the 7 species ( $V_{Lumen} = 28.9 \cdot BW^{1.00}$ ,  $R^2=0.88$ )

*T<sub>SI</sub>* is the small intestinal transit time obtained from Hatton et al (2015) [20]; <sup>q</sup>Myagmarjalbuu et al (2013) [21]; <sup>r</sup>Quini et al (2012) [22]; <sup>s</sup>Davies and Davies (2003) [23], considering jejunum and ileum; <sup>t</sup>Chandler et al (1997) [24]; <sup>u</sup>Steinmann et al (2020) [25]

**Supplementary Table S3.** Literature information collected for tissue distribution and blood partitioning of metformin

| Species | Tissue | Value  | Sex | Comments                          | Source                         |
|---------|--------|--------|-----|-----------------------------------|--------------------------------|
| $K_p$   |        |        |     |                                   |                                |
| Mouse   | Liver  | 4.47   | M   | $C_t/C_p$ (0.5 hr)                | Wilcock and Bailey (1994) [64] |
|         |        | 4.95   | M   | $C_t/C_p$ (1 hr)                  | Wilcock and Bailey (1994) [64] |
|         |        | 4.86   | M   | $C_t/C_p$ (2 hr)                  | Wilcock and Bailey (1994) [64] |
|         |        | 7.10   | M   | $C_t/C_p$ (4 hr)                  | Wilcock and Bailey (1994) [64] |
|         |        | 1.72   | M   | $AUC_t/AUC_p$ (0-8 hr)            | Lee et al (2014) [65]          |
|         |        | 1.82   | F   | $AUC_t/AUC_p$ (0-8 hr)            | Lee et al (2014) [65]          |
|         |        | 3.35   | M   | $C_t/C_p$ (at day 7)              | Chaudhari et al (2020) [66]    |
|         |        | 3.69   | F   | $C_t/C_p$ (at day 7)              | Chaudhari et al (2020) [66]    |
|         |        | 2.52   | M   | $C_t/C_p$ (at day 30)             | Chaudhari et al (2020) [66]    |
|         |        | 3.90   | F   | $C_t/C_p$ (at day 30)             | Chaudhari et al (2020) [66]    |
|         |        | 4.20   | M   | Median (10-300 mg/kg, 1.5-2.5 hr) | Higgins et al (2012) [27]*     |
|         |        | 2.30   | M   | $C_{t,ss}/C_{p,ss}$               | Ito et al (2012) [67]          |
|         |        | 1.81   | M   | $C_t/C_p$ (at day 98)             | Chae et al (2019) [68]         |
|         |        | 1.88   | M   | $C_t/C_p$ (at 24 hr)              | Toyama et al (2012) [69]*      |
|         |        | 2.13   | M   | $C_{t,ss}/C_{p,ss}$               | Nakamichi et al (2013) [28]*   |
|         |        | 4.83   | F   | $C_t/C_p$ (at 10 min)             | Wang et al (2002) [70]*        |
|         | Brain  | 0.184  | M   | $C_t/C_p$ (at day 7)              | Chaudhari et al (2020) [66]    |
|         |        | 0.257  | F   | $C_t/C_p$ (at day 7)              | Chaudhari et al (2020) [66]    |
|         |        | 0.174  | M   | $C_t/C_p$ (at day 30)             | Chaudhari et al (2020) [66]    |
|         |        | 0.237  | F   | $C_t/C_p$ (at day 30)             | Chaudhari et al (2020) [66]    |
|         |        | 0.0354 | M   | $C_{t,ss}/C_{p,ss}$               | Nakamichi et al (2013) [28]*   |
|         | Kidney | 3.35   | M   | $AUC_t/AUC_p$ (0-8 hr)            | Lee et al (2014) [65]          |
|         |        | 3.55   | F   | $AUC_t/AUC_p$ (0-8 hr)            | Lee et al (2014) [65]          |

|         |       |   |                                   |                                |
|---------|-------|---|-----------------------------------|--------------------------------|
|         | 5.30  | M | $C_t/C_p$ (at day 7)              | Chaudhari et al (2020) [66]    |
|         | 6.64  | F | $C_t/C_p$ (at day 7)              | Chaudhari et al (2020) [66]    |
|         | 4.90  | M | $C_t/C_p$ (at day 30)             | Chaudhari et al (2020) [66]    |
|         | 6.44  | F | $C_t/C_p$ (at day 30)             | Chaudhari et al (2020) [66]    |
|         | 11.8  | M | Median (10-300 mg/kg, 1.5-2.5 hr) | Higgins et al (2012) [27]*     |
|         | 5.00  | M | $C_{t,ss}/C_{p,ss}$               | Ito et al (2012) [67]          |
|         | 16.0  | M | $C_t/C_p$ (at day 98)             | Chae et al (2019) [68]         |
|         | 7.84  | M | $C_t/C_p$ (at 24 hr)              | Toyama et al (2012) [69]*      |
|         | 13.6  | M | $C_{t,ss}/C_{p,ss}$               | Nakamichi et al (2013) [28]*   |
|         | 20.5  | F | $C_t/C_p$ (at 10 min)             | Wang et al (2002) [70]*        |
| Muscle  | 0.537 | M | $AUC_t/AUC_p$ (0-8 hr)            | Lee et al (2014) [65]          |
|         | 0.582 | F | $AUC_t/AUC_p$ (0-8 hr)            | Lee et al (2014) [65]          |
|         | 1.38  | M | $C_t/C_p$ (at day 7)              | Chaudhari et al (2020) [66]    |
|         | 2.06  | F | $C_t/C_p$ (at day 7)              | Chaudhari et al (2020) [66]    |
|         | 1.00  | M | $C_t/C_p$ (at day 30)             | Chaudhari et al (2020) [66]    |
|         | 1.59  | F | $C_t/C_p$ (at day 30)             | Chaudhari et al (2020) [66]    |
|         | 0.771 | M | $C_t/C_p$ (at 24 hr)              | Toyama et al (2012) [69]*      |
|         | 0.359 | M | $C_{t,ss}/C_{p,ss}$               | Nakamichi et al (2013) [28]*   |
| Heart   | 0.599 | M | $AUC_t/AUC_p$ (0-8 hr)            | Lee et al (2014) [65]          |
|         | 0.712 | F | $AUC_t/AUC_p$ (0-8 hr)            | Lee et al (2014) [65]          |
|         | 0.519 | M | $C_{t,ss}/C_{p,ss}$               | Nakamichi et al (2013) [28]*   |
| Adipose | 0.471 | M | $C_{t,ss}/C_{p,ss}$               | Nakamichi et al (2013) [28]*   |
| Stomach | 5.25  | M | $C_t/C_p$ (at 0.5 hr)             | Wilcock and Bailey (1994) [64] |
|         | 4.67  | M | $C_t/C_p$ (at 1 hr)               | Wilcock and Bailey (1994) [64] |
|         | 6.57  | M | $C_t/C_p$ (at 2 hr)               | Wilcock and Bailey (1994) [64] |
|         | 9.03  | M | $C_t/C_p$ (at 4 hr)               | Wilcock and Bailey (1994) [64] |

|     |                 |             |   |                                     |                                |
|-----|-----------------|-------------|---|-------------------------------------|--------------------------------|
| Rat | Small intestine | 13.7-15.3   | M | $C_t/C_p$ (at 0.5 hr)               | Wilcock and Bailey (1994) [64] |
|     |                 | 14.6-21.1   | M | $C_t/C_p$ (at 1 hr)                 | Wilcock and Bailey (1994) [64] |
|     |                 | 9.57-21.3   | M | $C_t/C_p$ (at 2 hr)                 | Wilcock and Bailey (1994) [64] |
|     |                 | 12.3-17.7   | M | $C_t/C_p$ (at 4 hr)                 | Wilcock and Bailey (1994) [64] |
|     |                 | 4.42        | M | $C_{t,ss}/C_{p,ss}$                 | Nakamichi et al (2013) [28]*   |
|     |                 | 0.837       | F | $C_t/C_p$ (at 10 min)               | Wang et al (2002) [70]*        |
|     | Colon           | 4.52        | M | $C_t/C_p$ (at 0.5 hr)               | Wilcock and Bailey (1994) [64] |
|     |                 | 6.17        | M | $C_t/C_p$ (at 1 hr)                 | Wilcock and Bailey (1994) [64] |
|     |                 | 6.29        | M | $C_t/C_p$ (at 2 hr)                 | Wilcock and Bailey (1994) [64] |
|     |                 | 13.9        | M | $C_t/C_p$ (at 4 hr)                 | Wilcock and Bailey (1994) [64] |
|     | Salivary gland  | 2.60        | M | $AUC_t/AUC_p$ (0-8 hr)              | Lee et al (2014) [65]          |
|     |                 | 3.45        | F | $AUC_t/AUC_p$ (0-8 hr)              | Lee et al (2014) [65]          |
|     | Liver           | 2.91        | M | $C_t/C_p$ (at 2 hr)                 | Ma et al (2016) [71]*          |
|     |                 | 3.40        | M | $C_t/C_p$ (at 2 hr of day 7)        | Ma et al (2016) [71]*          |
|     |                 | 3.04-3.47   | M | $C_t/C_p$ (at 1 hr)                 | You et al (2018) [72]          |
|     |                 | 3.09-3.53   | M | $C_t/C_p$ (at 3 hr)                 | You et al (2018) [72]          |
|     |                 | 0.368-0.502 | M | $C_t/C_p$ (at 12 hr)                | You et al (2018) [72]          |
|     |                 | 6.83        | M | $C_t/C_p$ (at 2 hr)                 | Maeda et al (2007) [37]        |
|     |                 | 0.773       | M | $C_t/C_p$ (at 0.5 hr)               | Han and Choi [53]              |
|     |                 | 2.43        | M | $C_t/C_p$ (at 1 hr)                 | Han and Choi [53]              |
| Rat |                 | 3.81        | M | $C_t/C_p$ (at 3 hr)                 | Han and Choi [53]              |
|     |                 | 3.50        | M | $C_t/C_p$ (at 6 hr)                 | Han and Choi [53]              |
|     |                 | 0.491       | M | $C_t/C_p$ (at 24 hr), diabetic rats | Wu et al (2019) [73]*          |
|     | Kidney          | 5.15        | M | $C_t/C_p$ (at 2 hr)                 | Ma et al (2016) [71]*          |
|     |                 | 5.84        | M | $C_t/C_p$ (at 2 hr of day 7)        | Ma et al (2016) [71]*          |
|     |                 | 16.6        | M | $C_t/C_p$ (at 4 hr)                 | Nishizawa et al (2019) [52]    |



|                             |        |             |   |                                       |                           |
|-----------------------------|--------|-------------|---|---------------------------------------|---------------------------|
|                             |        | 4.16-5.92   | M | $C_t/C_p$ (at 1 hr)                   | You et al (2018) [72]     |
|                             |        | 4.86-5.64   | M | $C_t/C_p$ (at 3 hr)                   | You et al (2018) [72]     |
|                             |        | 0.604-0.861 | M | $C_t/C_p$ (at 12 hr)                  | You et al (2018) [72]     |
|                             |        | 24.9        | M | $C_t/C_p$ (at 2 hr)                   | Maeda et al (2007) [37]   |
|                             |        | 0.128       | M | $C_t/C_p$ (at 0.5 hr)                 | Han and Choi [53]         |
|                             |        | 3.39        | M | $C_t/C_p$ (at 1 hr)                   | Han and Choi [53]         |
|                             |        | 4.92        | M | $C_t/C_p$ (at 3 hr)                   | Han and Choi [53]         |
|                             |        | 5.92        | M | $C_t/C_p$ (at 6 hr)                   | Han and Choi [53]         |
|                             |        | 0.923       | M | $C_t/C_p$ (at 24 hr), diabetic rats   | Wu et al (2019) [73]*     |
|                             | Brain  | 0.2         | M | $C_t/C_p$ (at 1 hr)                   | Łabuzek et al (2010) [74] |
|                             |        | 0.69        | M | $C_t/C_p$ (at 4 hr)                   | Łabuzek et al (2010) [74] |
|                             |        | 0.99        | M | $C_t/C_p$ (at 6 hr)                   | Łabuzek et al (2010) [74] |
|                             |        | 0.64        | M | $C_t/C_p$ (at 12 hr)                  | Łabuzek et al (2010) [74] |
|                             |        | 1.48        | M | $C_t/C_p$ (at 24 hr)                  | Łabuzek et al (2010) [74] |
|                             | Heart  | 0.761       | M | $C_t/C_p$ (at 24 hr), diabetic rats   | Wu et al (2019) [73]*     |
|                             | Spleen | 0.956       | M | $C_t/C_p$ (at 2 hr)                   | Maeda et al (2007) [37]   |
|                             | Gut    | 4.63        | M | $C_t/C_p$ (at 2 hr)                   | Maeda et al (2007) [37]   |
|                             |        | 1.00        | M | $C_t/C_p$ (at 24 hr), diabetic rats   | Wu et al (2019) [73]*     |
|                             | Muscle | 0.455       | M | $C_t/C_p$ (at 2 hr)                   | Ma et al (2016) [71]*     |
|                             |        | 0.738       | M | $C_t/C_p$ (at 2 hr of day 7)          | Ma et al (2016) [71]*     |
|                             |        | 0.640       | M | $C_t/C_p$ (at 24 hr), diabetic rats   | Wu et al (2019) [73]*     |
| Monkey                      | Liver  | 15          | M | Fitted (equivalent to $AUC_t/AUC_p$ ) | Morse et al (2017) [57]   |
| <hr/>                       |        |             |   |                                       |                           |
| <i>f<sub>d,tissue</sub></i> |        |             |   |                                       |                           |
| Mouse                       | Kidney | 0.0953      | M | Kidney slice                          | Ito et al (2012) [67]     |
| Rat                         | Liver  | 0.231       |   | In vitro hepatocytes                  | Umehara et al (2007) [75] |
|                             |        | 0.345       | M | In vivo                               | Kimura et al (2005) [76]* |
|                             |        | 0.236       | F | In vivo                               | Kimura et al (2005) [76]* |
|                             |        | 0.261       | M | In vivo                               | Jin et al (2009) [41]     |
|                             |        | 0.0172      |   | In vitro hepatocytes                  | Liao et al (2019) [77]    |
|                             | Kidney | 0.443       | M | In vivo                               | Kimura et al (2005) [76]* |
|                             |        | 0.334       | F | In vivo                               | Kimura et al (2005) [76]* |
|                             |        | 0.00806     | M | Kidney slice                          | Ma et al (2016) [71]*     |

|        |        |            |   |                                        |                               |
|--------|--------|------------|---|----------------------------------------|-------------------------------|
|        |        | 0.262      | M | In vivo                                | Jin et al (2009) [41]         |
|        |        | 0.996      | M | Kidney slice                           | Umehara et al (2008) [78]     |
| Monkey | Liver  | 0.0428     |   | In vitro hepatocytes                   | Liao et al (2019) [77]        |
|        |        | 0.0722     | M | In vitro hepatocytes                   | Liao et al (2019) [77]        |
|        |        | 0.0342     | F | In vitro hepatocytes                   | Liao et al (2019) [77]        |
| Dog    | Liver  | 0.0250     |   | In vitro hepatocytes                   | Liao et al (2019) [77]        |
| Man    | Liver  | 0.0269     |   | In vitro hepatocytes                   | Umehara et al (2007) [75]     |
|        |        | 0.0285     |   | In vitro hepatocytes                   | Liao et al (2019) [77]        |
|        |        | 0.0185     | M | In vitro hepatocytes                   | Liao et al (2019) [77]        |
|        |        | 0.0370     | F | In vitro hepatocytes                   | Liao et al (2019) [77]        |
| <hr/>  |        |            |   |                                        |                               |
| $f_u$  |        |            |   |                                        |                               |
| Rat    | Plasma | 0.849      |   | Equilibrium dialysis (10 µg/mL)        | Choi et al (2006) [32]        |
|        |        | 0.874      |   | Equilibrium dialysis (5 µg/mL)         | Choi and Lee (2012) [45]      |
|        |        | 0.897      |   | Equilibrium dialysis (0.1 – 200 µg/mL) | Choi et al (2010) [44]        |
| Dog    | Plasma | 0.93       |   | Centrifugal filtration (0.05 – 10 mM)  | Garrett et al (1972) [79]     |
|        |        | 0.83-0.951 |   | Equilibrium dialysis (0.05 – 10 mM)    | Garrett et al (1972) [79]     |
|        | Blood  | 0.92       |   | Centrifugal filtration (0.05 – 10 mM)  | Garrett et al (1972) [79]     |
| Man    | Plasma | 1          |   | Equilibrium dialysis (0.05 – 5 µg/mL)  | Sirtori et al (1978) [60]     |
|        |        | 1          |   | Equilibrium dialysis (0.05 – 50 µg/mL) | Pentikäinen et al (1979) [61] |
|        |        | 1          |   | Equilibrium dialysis (0.1 – 10 µg/mL)  | Tucker et al (1981) [62]      |
|        |        | 0.899      |   | Centrifugal filtration (0.05 – 10 mM)  | Garrett et al (1972) [79]     |
|        |        | 0.75-0.98  |   | Equilibrium dialysis (0.05 – 10 mM)    | Garrett et al (1972) [79]     |
|        | Blood  | 0.932      |   | Centrifugal filtration (0.05 – 10 mM)  | Garrett et al (1972) [79]     |
| <hr/>  |        |            |   |                                        |                               |
| $R_b$  |        |            |   |                                        |                               |
| Rat    |        | 0.76-0.98  |   | In vitro (0.1 – 10 µg/mL, 72 hr)       | Xie et al (2015) [80]         |
|        |        | 0.98-1.37  |   | In vitro (0.1 – 10 µg/mL, 168 hr)      | Xie et al (2015) [80]         |
| Man    |        | 0.83-1.23  |   | In vitro (0.1 – 10 µg/mL, 168 hr)      | Xie et al (2015) [80]         |

\*Calculated from digitized data

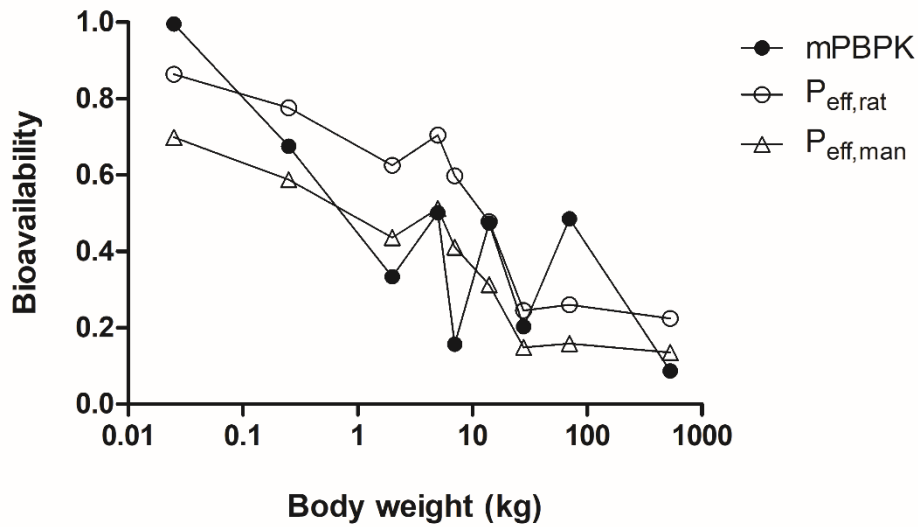

**Supplementary Figure S2.** ACAT model-based estimation of bioavailability using  $F_a = 1 - (1 + 2P_{eff}T_{SI}/7R)^{-7}$  (7-enteric compartments), assuming that the effective intestinal permeability ( $P_{eff}$ ) of the 9 species is the same with that of rat ( $P_{eff, rat}$ ), and that of man ( $P_{eff, man}$ ) predicted from Caco-2 cell permeability, which were compared with bioavailability determined from our mPBPK modeling (1-enteric compartment as a cylinder).

**Supplementary Table S4.** Calculation of the steady-state volume of distribution ( $V_{SS}$ ) using *in vivo* tissue  $K_p$  values based on the equation  $V_{SS} = V_B + \sum V_{T,i}K_{p,i}$  [81]. Tissue  $K_p$  values were assumed to be muscle  $K_p$  (1.03 for mouse and 0.597 for rat) if unavailable in Table 6.

| Tissue                 | Mouse (0.025 kg) |       |                      | Tissue               | Rat (0.25 kg) |       |                      |
|------------------------|------------------|-------|----------------------|----------------------|---------------|-------|----------------------|
|                        | $V_T$ (mL)       | $K_p$ | $V_T \cdot K_p$ (mL) |                      | $V_T$ (mL)    | $K_p$ | $V_T \cdot K_p$ (mL) |
| Adipose                | 1.88             | 0.471 | 0.885                | Adipose              | 16.7          | 0.597 | 9.97                 |
| Bone                   | 1.51             | 1.03  | 1.56                 | Bone                 | 15.7          | 0.597 | 9.37                 |
| Brain                  | 0.45             | 0.213 | 0.0959               | Brain                | 1.24          | 0.8   | 0.992                |
| Gut                    | 2.56             | 11.3  | 28.9                 | Gut                  | 6.19          | 4.63  | 28.7                 |
| Heart                  | 0.12             | 0.610 | 0.0732               | Heart                | 1.05          | 0.597 | 0.627                |
| Kidney                 | 0.34             | 8.74  | 2.97                 | Kidney               | 2.19          | 4.04  | 8.85                 |
| Liver                  | 1.19             | 3.47  | 4.13                 | Liver                | 8.57          | 3.07  | 26.3                 |
| Lung                   | 0.15             | 1.03  | 0.155                | Lung                 | 1.24          | 0.597 | 0.740                |
| Muscle                 | 9.5              | 1.03  | 9.79                 | Muscle               | 116           | 0.597 | 69.3                 |
| Skin                   | 3.07             | 1.03  | 3.16                 | Skin                 | 39.4          | 0.597 | 23.5                 |
| Spleen                 | 0.11             | 1.03  | 0.113                | Spleen               | 0.57          | 0.956 | 0.545                |
| Blood ( $V_B$ )        | 1.64             |       |                      | Blood ( $V_B$ )      | 15.3          |       |                      |
| $V_{SS,mouse}$ (mL/kg) |                  |       | 2140                 | $V_{SS,rat}$ (mL/kg) |               |       | 777                  |

<sup>a</sup> $V_T$  obtained from Simcyp V19

**Supplementary Table S5.** Model fitting results using a tri-exponential function [ $C_p(t) = C_1e^{-\lambda_1t} + C_2e^{-\lambda_2t} + C_3e^{-\lambda_3t}$ ] for metformin PK in various species (CV% obtained by fitting). It is noted that five parameters ( $C_1$ ,  $\lambda_1$ ,  $C_2$ ,  $\lambda_2$ , and  $\lambda_3$ ) were optimized while  $C_3$  values were estimated as a secondary parameter ( $C_3 = C_0 - C_1 - C_2$ ;  $C_0 = Dose/V_B$ )

| Species<br>(body<br>weight,<br>kg) | Source                           | $C_0$<br>( $\mu\text{g/mL}$ ) | $C_1$<br>( $\mu\text{g/mL}$ ) | $\lambda_1$<br>( $\text{min}^{-1}$ ) | $C_2$<br>( $\mu\text{g/mL}$ ) | $\lambda_2$<br>( $\text{min}^{-1}$ ) | $C_3$<br>( $\mu\text{g/mL}$ ) | $\lambda_3$<br>( $\text{min}^{-1}$ ) | $CL_D$<br>( $\text{mL/min}$ ) <sup>a</sup> | $Q_{CO}$<br>( $\text{mL/min}$ ) <sup>b</sup> | $CL$<br>( $\text{mL/min/kg}$ ) <sup>c</sup> | $V_{SS}$<br>( $\text{mL/kg}$ ) <sup>c</sup> |
|------------------------------------|----------------------------------|-------------------------------|-------------------------------|--------------------------------------|-------------------------------|--------------------------------------|-------------------------------|--------------------------------------|--------------------------------------------|----------------------------------------------|---------------------------------------------|---------------------------------------------|
| Mouse<br>(0.025)                   | Higgins et al<br>(2012) [27]     | 76.2                          | 69.1<br>(3.18)                | 2.49<br>(324)                        | 6.52<br>(32.9)                | 0.197<br>(22.0)                      | 0.601<br>(18.3)               | 0.0219<br>(12.0)                     | 2.32 (455)                                 | 14.0                                         | 56.7 (97.4)                                 | 918<br>(189)                                |
| Rat<br>(0.25)                      | Choi et al<br>(2006) [32]        | 817                           | 789<br>(0.404)                | 0.647<br>(5.56)                      | 27.3<br>(11.5)                | 0.0414<br>(6.94)                     | 1.01<br>(15.1)                | 0.00543<br>(8.21)                    | 3.52<br>(10.7)                             | 80.0                                         | 24.2 (3.25)                                 | 611<br>(6.79)                               |
|                                    |                                  | 1630                          | 1550<br>(0.459)               | 0.572<br>(4.39)                      | 80.6<br>(8.77)                | 0.0524<br>(4.54)                     | 1.85<br>(8.78)                | 0.00547<br>(4.99)                    | 2.90<br>(8.65)                             |                                              | 21.8 (2.50)                                 | 456<br>(4.99)                               |
|                                    |                                  | 3270                          | 2990<br>(1.49)                | 0.863<br>(19.7)                      | 277<br>(16.0)                 | 0.0494<br>(7.54)                     | 3.85<br>(19.7)                | 0.00600<br>(8.49)                    | 6.99<br>(29.7)                             |                                              | 20.6 (6.90)                                 | 477<br>(12.2)                               |
| Rabbit<br>(2)                      | Bouriche et al<br>(2020) [54]    | 83.3                          | 56.8<br>(6.48)                | 0.336<br>(17.5)                      | 17.9<br>(18.7)                | 0.0389<br>(21.6)                     | 8.63<br>(9.21)                | 0.00475<br>(5.63)                    | 24.5<br>(15.4)                             | 395                                          | 2.05 (1.87)                                 | 330<br>(3.72)                               |
| Cat (5)                            | Michels et al<br>(1999) [55]     | 417                           | 355<br>(1.31)                 | 0.127<br>(7.88)                      | 59.5<br>(7.58)                | 0.0114<br>(5.28)                     | 2.17<br>(13.7)                | 0.00123<br>(11.3)                    | 20.2<br>(11.0)                             | 786                                          | 2.55 (2.43)                                 | 501<br>(8.43)                               |
| Monkey<br>(7)                      | Shen et al<br>(2016) [56]        | 65.0                          | 62.6<br>(0.726)               | 0.210<br>(9.20)                      | 2.35<br>(19.2)                | 0.0201<br>(11.5)                     | 0.0422<br>(27.9)              | 0.00138<br>(9.61)                    | 23.9<br>(19.9)                             | 1010                                         | 8.75 (5.39)                                 | 576<br>(13.0)                               |
| Minipig<br>(14)                    | Patel et al<br>(2017) [58]       | 8.0                           | 7.24<br>(2.15)                | 0.752<br>(21.2)                      | 0.744<br>(20.8)               | 0.0250<br>(14.7)                     | 0.0176<br>(21.8)              | 0.00122<br>(16.5)                    | 468 (25.5)                                 | 1700                                         | 9.29 (7.69)                                 | 2240<br>(19.7)                              |
| Dog<br>(28)                        | Johnston et al<br>(2017) [59]    | 275                           | 266<br>(0.175)                | 0.201<br>(4.66)                      | 8.96<br>(5.15)                | 0.0123<br>(3.03)                     | 0.217<br>(6.24)               | 0.00105<br>(4.47)                    | 183 (8.33)                                 | 2860                                         | 10.9 (2.56)                                 | 1270<br>(5.65)                              |
| Man<br>(70)                        | Tucker et al<br>(1981) [62]      | 48.1                          | 43.1<br>(1.47)                | 0.164<br>(6.91)                      | 4.56<br>(13.0)                | 0.0175<br>(9.43)                     | 0.404<br>(19.9)               | 0.00395<br>(8.68)                    | 373 (11.1)                                 | 5690                                         | 5.71 (2.64)                                 | 387<br>(5.02)                               |
|                                    | Pentikäinen et al<br>(1979) [61] | 96.1                          | 79.7<br>(0.725)               | 0.930<br>(19.4)                      | 13.5<br>(4.05)                | 0.0325<br>(4.21)                     | 2.91<br>(4.10)                | 0.00658<br>(1.48)                    | 3500<br>(21.5)                             |                                              | 7.57 (1.62)                                 | 643<br>(3.00)                               |
|                                    | Sirtori et al<br>(1978) [60]     | 178                           | 136<br>(7.01)                 | 0.513<br>(36.4)                      | 34.5<br>(25.8)                | 0.0391<br>(25.6)                     | 7.40<br>(25.3)                | 0.00768<br>(9.25)                    | 1640<br>(39.6)                             |                                              | 6.27 (4.96)                                 | 441<br>(8.22)                               |
| Horse<br>(530)                     | Hustace et al<br>(2009) [63]     | 150                           | 125<br>(4.32)                 | 0.208<br>(28.0)                      | 25.2<br>(21.5)                | 0.0297<br>(8.87)                     | 0.119<br>(fixed)              | 0.000599<br>(fixed)                  | 3460<br>(44.5)                             | 26000                                        | 6.86 (8.54)                                 | 1510<br>(16.7)                              |

<sup>a</sup> $CL_D = Dose \left( \frac{\sum C_i \lambda_i}{C_0^2} - \frac{1}{AUC} \right)$  estimated as a secondary parameter

<sup>b</sup> $Q_{CO}$  obtained from Supplementary Table S1

<sup>c</sup> $CL$  and  $V_{SS}$  estimated as a secondary parameter where  $CL = \frac{Dose}{AUC}$  and  $V_{SS} = \frac{Dose \cdot AUMC}{AUC^2}$

## References

1. Brown, R.; Delp, M.; Lindstedt, S.; Rhomberg, L.; Beliles, R. Physiological parameter values for physiologically based pharmacokinetic models. *Toxicol. Ind. Health* **1997**, *13407*, 407-484.
2. Wolfensohn, S.; Lloyd, M. Handbook of laboratory animal management and welfare. **2003**.
3. Lin, J.H. Species similarities and differences in pharmacokinetics. *Drug Metab. Dispos.* **1995**, *23*, 1008-1021.
4. Kararli, T.T. Comparison of the gastrointestinal anatomy, physiology, and biochemistry of humans and commonly used laboratory animals. *Biopharm. Drug Dispos.* **1995**, *16*, 351-380, doi:10.1002/bdd.2510160502.
5. Davies, B.; Morris, T. Physiological parameters in laboratory animals and humans. *Pharm. Res.* **1993**, *10*, 1093-1095.
6. Lindstedt, S.L.; Schaeffer, P. Use of allometry in predicting anatomical and physiological parameters of mammals. *Lab. Anim.* **2002**, *36*, 1-19.
7. Jamei, M.; Marciniak, S.; Feng, K.; Barnett, A.; Tucker, G.; Rostami-Hodjegan, A. The Simcyp® population-based ADME simulator. *Expert Opin. Drug Metab. Toxicol.* **2009**, *5*, 211-223.
8. Suenderhauf, C.; Parrott, N. A physiologically based pharmacokinetic model of the minipig: data compilation and model implementation. *Pharm. Res.* **2013**, *30*, 1-15.
9. Sweeney, L.M.; Kirman, C.R.; Gannon, S.A.; Thrall, K.D.; Gargas, M.L.; Kinzell, J.H. Development of a physiologically based pharmacokinetic (PBPK) model for methyl iodide in rats, rabbits, and humans. *Inhalation Toxicol.* **2009**, *21*, 552-582, doi:10.1080/08958370802601569.
10. Staddon, G.; Weaver, B.; Lunn, C. A "standard horse" for use in physiologically based mathematical modelling. *Equine Vet. J.* **1984**, *16*, 189-191.
11. Von Hendy-Willson, V.E.; Pressler, B.M. An overview of glomerular filtration rate testing in dogs and cats. *Vet. J.* **2011**, *188*, 156-165.
12. Walsh, D.; Royal, H. Evaluation of a single injection of 99mTc-labeled diethylenetriaminepentaacetic acid for measuring glomerular filtration rate in horses. *Am. J. Vet. Res.* **1992**, *53*, 776-780.
13. Thuesen, A.D.; Andersen, H.; Cardel, M.; Toft, A.; Walter, S.; Marcussen, N.; Jensen, B.L.; Bie, P.; Hansen, P.B. Differential effect of T-type voltage-gated Ca<sup>2+</sup> channel disruption on renal plasma flow and glomerular filtration rate in vivo. *Am. J. Physiol.: Renal, Fluid Electrolyte Physiol.* **2014**, *307*, F445-F452.
14. Wesolowski, C.A.; Wanasundara, S.N.; Babyn, P.S.; Alcorn, J. Comparison of the gamma-Pareto convolution with conventional methods of characterising metformin pharmacokinetics in dogs. *J. Pharmacokinet. Pharmacodyn.* **2020**, *47*, 19-45.
15. Holdstock, N.B.; Ousey, J.C.; Rossdale, P. Glomerular filtration rate, effective renal plasma flow, blood pressure and pulse rate in the equine neonate during the first 10 days post partum. *Equine Vet. J.* **1998**, *30*, 335-343.
16. Ferraris, R.P.; Lee, P.P.; Diamond, J.M. Origin of regional and species differences in intestinal glucose uptake. *Am. J. Physiol.: Gastrointest. Liver Physiol.* **1989**, *257*, G689-G697.
17. Merchant, H.A.; McConnell, E.L.; Liu, F.; Ramaswamy, C.; Kulkarni, R.P.; Basit, A.W.; Murdan, S. Assessment of gastrointestinal pH, fluid and lymphoid tissue in the guinea pig, rabbit and pig, and implications for their use in drug development. *Eur. J. Pharm. Sci.* **2011**, *42*, 3-10.
18. Bettini, G.; Muracchini, M.; Della Salda, L.; Preziosi, R.; Morini, M.; Guglielmini, C.; Sanguinetti, V.; Marcato, P. Hypertrophy of intestinal smooth muscle in cats. *Res. Vet. Sci.* **2003**, *75*, 43-53.
19. Clauss, M.; Frey, R.; Kiefer, B.; Lechner-Doll, M.; Loehlein, W.; Polster, C.; Rössner, G.; Streich, W.J. The maximum attainable body size of herbivorous mammals: morphophysiological constraints on foregut, and adaptations of hindgut fermenters. *Oecologia* **2003**, *136*, 14-27.
20. Hatton, G.B.; Yadav, V.; Basit, A.W.; Merchant, H.A. Animal farm: considerations in animal gastrointestinal physiology and relevance to drug delivery in humans. *J. Pharm. Sci.* **2015**, *104*, 2747-2776.
21. Myagmarjalbuu, B.; Moon, M.J.; Heo, S.H.; Jeong, S.I.; Park, J.-S.; Jun, J.Y.; Jeong, Y.Y.; Kang, H.K. Establishment of a protocol for determining gastrointestinal transit time in mice using barium and radiopaque markers. *Korean J. Radiol.* **2013**, *14*, 45.
22. Quini, C.C.; Américo, M.F.; Corá, L.A.; Calabresi, M.F.; Alvarez, M.; Oliveira, R.B.; Miranda, J.A. Employment of a noninvasive magnetic method for evaluation of gastrointestinal transit in rats. *J. Biol. Eng.* **2012**, *6*, 1-6.
23. Davies, R.R.; Davies, J.A.R. Rabbit gastrointestinal physiology. *Vet. Clin. North Am. Exot. Anim. Pract.* **2003**, *6*, 139-153.

24. Chandler, M.L.; Guilford, G.; Lawoko, C.R. Radiopaque markers to evaluate gastric emptying and small intestinal transit time in healthy cats. *J. Vet. Intern. Med.* **1997**, *11*, 361-364.
25. Steinmann, M.; Bezugley, R.J.; Bond, S.L.; Pomrantz, J.S.; Léguillette, R. A wireless endoscopy capsule suitable for imaging of the equine stomach and small intestine. *J. Vet. Intern. Med.* **2020**, *34*, 1622-1630.
26. Tsuda, M.; Terada, T.; Mizuno, T.; Katsura, T.; Shimakura, J.; Inui, K.-i. Targeted disruption of the multidrug and toxin extrusion 1 (mate1) gene in mice reduces renal secretion of metformin. *Mol. Pharmacol.* **2009**, *75*, 1280-1286.
27. Higgins, J.W.; Bedwell, D.W.; Zamek-Gliszczynski, M.J. Ablation of both organic cation transporter (OCT) 1 and OCT2 alters metformin pharmacokinetics but has no effect on tissue drug exposure and pharmacodynamics. *Drug Metab. Dispos.* **2012**, *40*, 1170-1177.
28. Nakamichi, N.; Shima, H.; Asano, S.; Ishimoto, T.; Sugiura, T.; Matsubara, K.; Kusuhaara, H.; Sugiyama, Y.; Sai, Y.; Miyamoto, K.-i. Involvement of carnitine/organic cation transporter OCTN1/SLC22A4 in gastrointestinal absorption of metformin. *J. Pharm. Sci.* **2013**, *102*, 3407-3417.
29. Chen, E.C.; Liang, X.; Yee, S.W.; Geier, E.G.; Stocker, S.L.; Chen, L.; Giacomini, K.M. Targeted disruption of organic cation transporter 3 attenuates the pharmacologic response to metformin. *Mol. Pharmacol.* **2015**, *88*, 75-83.
30. Shirasaka, Y.; Lee, N.; Zha, W.; Wagner, D.; Wang, J. Involvement of organic cation transporter 3 (Oct3/Slc22a3) in the bioavailability and pharmacokinetics of antidiabetic metformin in mice. *Drug Metab. Pharmacokinet.* **2016**, *31*, 385-388.
31. KAKEMI, M.; SASAKI, H.; SAEKI, K.; ENDOH, M.; KATAYAMA, K.; KOIZUMI, T. Pharmacologic effects of metformin in relation to its disposition in alloxan diabetic rats. *J. Pharmacobio-Dyn.* **1983**, *6*, 71-87.
32. Choi, Y.H.; Kim, S.G.; Lee, M.G. Dose-independent pharmacokinetics of metformin in rats: Hepatic and gastrointestinal first-pass effects. *J. Pharm. Sci.* **2006**, *95*, 2543-2552, doi:10.1002/jps.20744.
33. Choi, Y.; Lee, M. Effects of enzyme inducers and inhibitors on the pharmacokinetics of metformin in rats: involvement of CYP2C11, 2D1 and 3A1/2 for the metabolism of metformin. *Br. J. Pharmacol.* **2006**, *149*, 424-430.
34. Choi, Y.H.; Lee, I.; Lee, M.G. Effects of bacterial lipopolysaccharide on the pharmacokinetics of metformin in rats. *Int. J. Pharm.* **2007**, *337*, 194-201.
35. Choi, Y.H.; Lee, I.; Lee, M.G. Effects of water deprivation on the pharmacokinetics of metformin in rats. *Biopharm. Drug Dispos.* **2007**, *28*, 373-383.
36. Choi, M.K.; Jin, Q.R.; Jin, H.E.; Shim, C.K.; Cho, D.Y.; Shin, J.G.; Song, I.S. Effects of tetraalkylammonium compounds with different affinities for organic cation transporters on the pharmacokinetics of metformin. *Biopharm. Drug Dispos.* **2007**, *28*, 501-510.
37. Maeda, T.; Oyabu, M.; Yotsumoto, T.; Higashi, R.; Nagata, K.; Yamazoe, Y.; Tamai, I. Effect of pregnane X receptor ligand on pharmacokinetics of substrates of organic cation transporter Oct1 in rats. *Drug Metab. Dispos.* **2007**, *35*, 1580-1586.
38. Lee, M.G.; Choi, Y.H.; Lee, I. Effects of diabetes mellitus induced by alloxan on the pharmacokinetics of metformin in rats: restoration of pharmacokinetic parameters to the control state by insulin treatment. *J. Pharm. Pharm. Sci.* **2008**, *11*, 88-103.
39. Choi, Y.H.; Lee, D.C.; Lee, I.; Lee, M.G. Changes in metformin pharmacokinetics after intravenous and oral administration to rats with short-term and long-term diabetes induced by streptozotocin. *J. Pharm. Sci.* **2008**, *97*, 5363-5375.
40. Choi, Y.; Chung, S.; Lee, M. Pharmacokinetic interaction between DA-8159, a new erectogenic, and metformin in rats: competitive inhibition of metabolism via hepatic CYP3A1/2. *Br. J. Pharmacol.* **2008**, *153*, 1568-1578.
41. Jin, H.-E.; Hong, S.-S.; Choi, M.-K.; Maeng, H.-J.; Kim, D.-D.; Chung, S.-J.; Shim, C.-K. Reduced antidiabetic effect of metformin and down-regulation of hepatic Oct1 in rats with ethynylestradiol-induced cholestasis. *Pharm. Res.* **2009**, *26*, 549-559.
42. Cho, Y.; Choi, Y.; Kim, S.; Lee, M. Effects of Escherichia coli lipopolysaccharide on the metformin pharmacokinetics in rats. *Xenobiotica; the fate of foreign compounds in biological systems* **2009**, *39*, 946-954.
43. Lee, J.; Kang, H.; Lee, M. Pharmacokinetic interaction between telithromycin and metformin in diabetes mellitus rats. *Xenobiotica; the fate of foreign compounds in biological systems* **2010**, *40*, 217-224.
44. Choi, Y.; Lee, U.; Lee, B.; Lee, M. Pharmacokinetic interaction between itraconazole and metformin in rats: competitive inhibition of metabolism of each drug by each other via hepatic and intestinal CYP3A1/2. *Br. J. Pharmacol.* **2010**, *161*, 815-829.

45. Choi, Y.H.; Lee, M.G. Pharmacokinetic and pharmacodynamic interaction between nifedipine and metformin in rats: competitive inhibition for metabolism of nifedipine and metformin by each other via CYP isozymes. *Xenobiotica; the fate of foreign compounds in biological systems* **2012**, *42*, 483-495.
46. Lee, Y.K.; Chin, Y.-W.; Choi, Y.H. Effects of Korean red ginseng extract on acute renal failure induced by gentamicin and pharmacokinetic changes by metformin in rats. *Food Chem. Toxicol.* **2013**, *59*, 153-159.
47. Kwon, M.; Choi, Y.A.; Choi, M.-K.; Song, I.-S. Organic cation transporter-mediated drug–drug interaction potential between berberine and metformin. *Arch. Pharmacol. Res.* **2015**, *38*, 849-856.
48. Ma, Y.-r.; Qin, H.-y.; Jin, Y.-w.; Huang, J.; Han, M.; Wang, X.-d.; Zhang, G.-q.; Zhou, Y.; Rao, Z.; Wu, X.-a. Gender-related differences in the expression of organic cation transporter 2 and its role in urinary excretion of metformin in rats. *Eur. J. Drug Metab. Pharmacokinet.* **2016**, *41*, 559-565.
49. Gabr, R.Q.; El-Sherbeni, A.A.; Ben-Eltriki, M.; El-Kadi, A.O.; Brocks, D.R. Pharmacokinetics of metformin in the rat: assessment of the effect of hyperlipidemia and evidence for its metabolism to guanylurea. *Can. J. Physiol. Pharmacol.* **2017**, *95*, 530-538.
50. Ma, Y.-r.; Zhou, Y.; Huang, J.; Qin, H.-y.; Wang, P.; Wu, X.-a. The urinary excretion of metformin, ceftizoxime and ofloxacin in high serum creatinine rats: Can creatinine predict renal tubular elimination? *Life Sci.* **2018**, *196*, 110-117.
51. Yang, S.; Dai, Y.; Liu, Z.; Wang, C.; Meng, Q.; Huo, X.; Sun, H.; Ma, X.; Peng, J.; Liu, K. Involvement of organic cation transporter 2 in the metformin-associated increased lactate levels caused by contrast-induced nephropathy. *Biomed. Pharmacother.* **2018**, *106*, 1760-1766.
52. Nishizawa, K.; Yoda, N.; Morokado, F.; Komori, H.; Nakanishi, T.; Tamai, I. Changes of drug pharmacokinetics mediated by downregulation of kidney organic cation transporters Mate1 and Oct2 in a rat model of hyperuricemia. *PLoS One* **2019**, *14*, e0214862.
53. Han, S.Y.; Choi, Y.H. Pharmacokinetic interaction between metformin and verapamil in rats: Inhibition of the OCT2-mediated renal excretion of metformin by verapamil. *Pharmaceutics* **2020**, *12*, 468.
54. Bouriche, S.; Alonso-García, A.; Cárceles-Rodríguez, C.M.; Rezgui, F.; Fernández-Varón, E. Potential of sustained release microparticles of metformin in veterinary medicine: An in vivo pharmacokinetic study of metformin microparticles as oral sustained release formulation in rabbits. *BMC Vet. Res.* **2020**.
55. Michels, G.M.; Boudinot, F.; Ferguson, D.C.; Hoenig, M. Pharmacokinetics of the antihyperglycemic agent metformin in cats. *Am. J. Vet. Res.* **1999**, *60*, 738-742.
56. Shen, H.; Liu, T.; Jiang, H.; Titsch, C.; Taylor, K.; Kandoussi, H.; Qiu, X.; Chen, C.; Sukrutharaj, S.; Kuit, K. Cynomolgus monkey as a clinically relevant model to study transport involving renal organic cation transporters: in vitro and in vivo evaluation. *Drug Metab. Dispos.* **2016**, *44*, 238-249.
57. Morse, B.L.; MacGuire, J.G.; Marino, A.M.; Zhao, Y.; Fox, M.; Zhang, Y.; Shen, H.; Humphreys, W.G.; Marathe, P.; Lai, Y. Physiologically based pharmacokinetic modeling of transporter-mediated hepatic clearance and liver partitioning of OATP and OCT substrates in cynomolgus monkeys. *AAPS J.* **2017**, *19*, 1878-1889.
58. Patel, N.J.; Yumibe, N.; Ruterbories, K.; Huang, N.; Burns, L.; Tan, J.; White, D.; Liu, J.; Brocksmith, D.; Bouchard, G. Pharmacokinetics of intravenous and oral metformin and r, s-verapamil in Sinclair, Hanford, Yucatan and Göttingen minipigs. *Int. J. Pharmacokinet.* **2017**, *2*, 81-91.
59. Johnston, C.A.; Dickinson, V.S.M.; Alcorn, J.; Gaunt, M.C. Pharmacokinetics and oral bioavailability of metformin hydrochloride in healthy mixed-breed dogs. *Am. J. Vet. Res.* **2017**, *78*, 1193-1199.
60. Sirtori, C.R.; Franceschini, G.; Galli-Kienle, M.; Cighetti, G.; Galli, G.; Bondioli, A.; Conti, F. Disposition of metformin (N, N-dimethylbiguanide) in man. *Clin. Pharmacol. Ther.* **1978**, *24*, 683-693.
61. Pentikäinen, P.; Neuvonen, P.; Penttilä, A. Pharmacokinetics of metformin after intravenous and oral administration to man. *Eur. J. Clin. Pharmacol.* **1979**, *16*, 195-202.
62. Tucker, G.; Casey, C.; Phillips, P.; Connor, H.; Ward, J.; Woods, H. Metformin kinetics in healthy subjects and in patients with diabetes mellitus. *Br. J. Clin. Pharmacol.* **1981**, *12*, 235-246.
63. Hustace, J.L.; Firshman, A.M.; Mata, J.E. Pharmacokinetics and bioavailability of metformin in horses. *Am. J. Vet. Res.* **2009**, *70*, 665-668.
64. Wilcock, C.; Bailey, C. Accumulation of metformin by tissues of the normal and diabetic mouse. *Xenobiotica; the fate of foreign compounds in biological systems* **1994**, *24*, 49-57.
65. Lee, N.; Duan, H.; Hebert, M.F.; Liang, C.J.; Rice, K.M.; Wang, J. Taste of a pill. *J. Biol. Chem.* **2014**, *289*, 27055-27064.



66. Chaudhari, K.; Wang, J.; Xu, Y.; Winters, A.; Wang, L.; Dong, X.; Cheng, E.Y.; Liu, R.; Yang, S.-H. Determination of metformin bio-distribution by LC-MS/MS in mice treated with a clinically relevant paradigm. *PLoS One* **2020**, *15*, e0234571.
67. Ito, S.; Kusuhara, H.; Yokochi, M.; Toyoshima, J.; Inoue, K.; Yuasa, H.; Sugiyama, Y. Competitive inhibition of the luminal efflux by multidrug and toxin extrusions, but not basolateral uptake by organic cation transporter 2, is the likely mechanism underlying the pharmacokinetic drug-drug interactions caused by cimetidine in the kidney. *J. Pharmacol. Exp. Ther.* **2012**, *340*, 393-403.
68. Chae, H.-S.; You, B.H.; Choi, J.; Chin, Y.-W.; Kim, H.; Choi, H.S.; Choi, Y.H. Ginseng berry extract enhances metformin efficacy against obesity and hepatic steatosis in mice fed high-fat diet through increase of metformin uptake in liver. *J. Funct. Foods* **2019**, *62*, 103551.
69. Toyama, K.; Yonezawa, A.; Masuda, S.; Osawa, R.; Hosokawa, M.; Fujimoto, S.; Inagaki, N.; Inui, K.; Katsura, T. Loss of multidrug and toxin extrusion 1 (MATE1) is associated with metformin-induced lactic acidosis. *Br. J. Pharmacol.* **2012**, *166*, 1183-1191.
70. Wang, D.-S.; Jonker, J.W.; Kato, Y.; Kusuhara, H.; Schinkel, A.H.; Sugiyama, Y. Involvement of organic cation transporter 1 in hepatic and intestinal distribution of metformin. *J. Pharmacol. Exp. Ther.* **2002**, *302*, 510-515.
71. Ma, Y.r.; Shi, A.x.; Qin, H.y.; Zhang, T.; Wu, Y.f.; Zhang, G.q.; Wu, X.a. Metoprolol decreases the plasma exposure of metformin via the induction of liver, kidney and muscle uptake in rats. *Biopharm. Drug Dispos.* **2016**, *37*, 511-521.
72. You, B.H.; Chin, Y.W.; Kim, H.; Choi, H.S.; Choi, Y.H. Houlttuynia cordata extract increased systemic exposure and liver concentrations of metformin through OCTs and MATEs in rats. *Phytother. Res.* **2018**, *32*, 1004-1013.
73. Wu, B.; Chen, M.; Gao, Y.; Hu, J.; Liu, M.; Zhang, W.; Huang, W. In vivo pharmacodynamic and pharmacokinetic effects of metformin mediated by the gut microbiota in rats. *Life Sci.* **2019**, *226*, 185-192.
74. Łabuzek, K.; Suchy, D.; Gabryel, B.; Bielecka, A.; Liber, S.; Okopień, B. Quantification of metformin by the HPLC method in brain regions, cerebrospinal fluid and plasma of rats treated with lipopolysaccharide. *Pharmacol. Rep.* **2010**, *62*, 956-965.
75. Umehara, K.-I.; Iwatsubo, T.; Noguchi, K.; Kamimura, H. Functional involvement of organic cation transporter1 (OCT1/Oct1) in the hepatic uptake of organic cations in humans and rats. *Xenobiotica; the fate of foreign compounds in biological systems* **2007**, *37*, 818-831.
76. Kimura, N.; Masuda, S.; Tanihara, Y.; Ueo, H.; Okuda, M.; Katsura, T.; Inui, K.-i. Metformin is a superior substrate for renal organic cation transporter OCT2 rather than hepatic OCT1. *Drug Metab. Pharmacokinet.* **2005**, *20*, 379-386.
77. Liao, M.; Zhu, Q.; Zhu, A.; Gemski, C.; Ma, B.; Guan, E.; Li, A.P.; Xiao, G.; Xia, C.Q. Comparison of uptake transporter functions in hepatocytes in different species to determine the optimal model for evaluating drug transporter activities in humans. *Xenobiotica; the fate of foreign compounds in biological systems* **2019**, *49*, 852-862.
78. Umehara, K.; Iwatsubo, T.; Noguchi, K.; Kamimura, H. Functional involvement of the organic cation transporter 2 (rOct2) in the renal uptake of organic cations in rats. *J. Int. Med. Res.* **2008**, *36*, 123-136.
79. Garrett, E.R.; Tsau, J.; Hinderling, P.H. Application of ion-pair methods to drug extraction from biological fluids II: Quantitative determination of biguanides in biological fluids and comparison of protein binding estimates. *J. Pharm. Sci.* **1972**, *61*, 1411-1418.
80. Xie, F.; Ke, A.B.; Bowers, G.D.; Zamek-Gliszczynski, M.J. Metformin's intrinsic blood-to-plasma partition ratio (B/P): reconciling the perceived high in vivo B/P > 10 with the in vitro equilibrium value of unity. *J. Pharmacol. Exp. Ther.* **2015**, *354*, 225-229.
81. Øie, S.; Tozer, T.N. Effect of altered plasma protein binding on apparent volume of distribution. *J. Pharm. Sci.* **1979**, *68*, 1203-1205.
